# Supplementary material
Source: ML conference proceedings conference paper supplement (https://openreview.net/forum?id=JRcfgNg2ZJ)
Supplement: supplementary_material [file attachment]

000  
001  
002  
003  
004  
005  
006  
007  
008  
009  
010  
011  
012  
013  
014  
015  
016  
017  
018  
019  
020  
021  
022  
023  
024  
025  
026  
027  
028  
029  
030  
031  
032  
033  
034  
035  
036  
037  
038  
039  
040  
041  
042  
043  
044  
045  
046  
047  
048  
049  
050  
051  
052  
053

# SUPPLEMENTARY MATERIAL FOR DEBIASED IMBALANCED PSEUDO-LABELING FOR GENERALIZED CATEGORY DISCOVERY

**Anonymous authors**

Paper under double-blind review

## CONTENTS

|                                                 |          |
|-------------------------------------------------|----------|
| <b>1 Pseudo codes</b>                           | <b>2</b> |
| <b>2 Description of representation Learning</b> | <b>2</b> |
| <b>3 Training time and computation cost</b>     | <b>3</b> |

## 1 PSEUDO CODES

The following algorithm outlines the training process of our DebiasGCD method. Each variable and formula are annotated, and every function is linked to the specific equations presented in our paper.

---

### Algorithm 1 Pseudo code on one step for DebiasGCD

---

```

054
055
056
057
058
059
060
061 1 #x1, x2: two view samples
062 2 #s_proj, s_cls, t_cls, s_patch, t_patch: projection feature, logits (
063   similarity), and patch tokens for student and teacher
064 3 #label, mask: image label and corresponding mask
065 4
066 5 def training_step(x1, x2):
067 6     s_proj, s_cls, s_patch = model([x1, x2])
068 7     t_cls = s_cls.detach()
069 8     t_patch = s_patch.detach()
070 9
071 10 #Representation learning
072 11 loss_{rep} = contrastive_learning(s_proj, label, mask)
073 12
074 13 #Regularization loss
075 14 loss_reg = mean_max_entropy(s_cls)
076 15
077 16 #Classification uses ground-truth labels on labeled data
078 17 loss^l_{cls} = cross_entropy(t_cls, s_cls, label=target[mask=1])
079 18
080 19 #Classification using pseudo-labels in all data
081 20 loss^u_{cls} = entropy(t_cls, s_cls) #Eq.(3)
082 21
083 22 #DPD loss in #Eq.(4)
084 23 topn_val = Top-N(s_cls[label=target[mask=1], largest=False)
085 24 loss_{rank} = margin_rank(s_cls[label=target[mask=1]], topn_val)
086 25
087 26 #LRA loss
088 27 loss_{patch} = entropy(t_patch, s_patch) #Eq.(6)
089 28
090 29 #Self-distillation
091 30 loss_{self-dis} = loss^l_{cls} + loss^u_{cls} + loss_{patch}
092 31
093 32 # Overall loss
094 33 loss = loss_{rep} + loss_{self-dis} + loss_{rank} - loss_reg # Eq.(7)
095 34
096 35 return loss

```

---

## 2 DESCRIPTION OF REPRESENTATION LEARNING

This is the whole representation learning in GCD work. Formally, given two views  $x_i$  and  $x'_i$  of the same image in a all data  $\mathcal{D}$ , the parameters of feature extractor  $\Phi$  can be updated by the InfoNCE loss (van den Oord et al., 2018) in self-supervised contrastive learning:

$$\mathcal{L}_{rep}(\theta; \mathcal{D}) = -\frac{1}{|\mathcal{D}|} \sum_{\mathbf{x}_i \in \mathcal{D}} \log \frac{\exp \langle \mathbf{z}_i^{cls}, \mathbf{z}_i^{cls'} \rangle / \tau}{\sum_{n \neq i} \exp \langle \mathbf{z}_i^{cls}, \mathbf{z}_n^{cls} \rangle / \tau} \quad (1)$$

where  $\mathbf{z}^{cls}$  is the first row vector in its feature representation  $\mathbf{z}_i = h \circ (\Phi(x_i))$ , denoted as  $\mathbf{z}_i^{cls}$ .  $\tau$  is a temperature hyperparameter. Analogous to Eq. (1), we use supervised contrastive loss in the same class as:

$$\mathcal{L}_{rep}(\theta; \mathcal{D}^l) = -\frac{1}{|\mathcal{D}^l|} \sum_{\mathbf{x}_i \in \mathcal{D}^l} -\frac{1}{|\mathcal{N}(i)|} \sum_{q \in \mathcal{N}(i)} \log \frac{\exp \langle \mathbf{z}_i^{cls}, \mathbf{z}_q^{cls} \rangle / \tau}{\sum_{n \neq i} \exp \langle \mathbf{z}_i^{cls}, \mathbf{z}_n^{cls} \rangle / \tau} \quad (2)$$

Finally, the total contrastive loss on the model’s representation is given as:

$$\mathcal{L}_{rep}(\theta; \mathcal{D}) = (1 - \lambda_1) \mathcal{L}_{rep}(\theta; \mathcal{D}^u) + \lambda_1 \mathcal{L}_{rep}(\theta; \mathcal{D}^l) \quad (3)$$

### 3 TRAINING TIME AND COMPUTATION COST

In this part, we compare the efficiency of time and resources used in current competitive works, such as LegoGCD and SPTNet. Table 1 shows the training time and computation costs in CUB datasets. Specifically, although SPTNet shows competitive performance, but it cost near and over 5 times in GPU memory and training time compared with our method, and our approach and baseline SimGCD, and LegoGCD all took about the same amount of time and computing resources. Therefore, our proposed method is efficient in classification, time, and computation cost.

Table 1: Comparison of computation costs among existing methods on CUB dataset. Our method is more efficient than SPTNet (Wang et al., 2024).

| Method                    | Epoch | Training Time        | GPU usage (MiB) | All  | Old  | New  |
|---------------------------|-------|----------------------|-----------------|------|------|------|
| SimGCD Wen et al. (2023)  | 200   | 4 hours and 35 mins  | 5854            | 60.3 | 65.6 | 57.7 |
| LegoGCD Cao et al. (2024) | 200   | 4 hours and 40 mins  | 5884            | 63.8 | 71.9 | 59.8 |
| SPTNet Wang et al. (2024) | 1000  | 23 hours and 21 mins | 29682           | 65.8 | 68.8 | 65.1 |
| Ours                      | 200   | 4 hours and 38mins   | 6224            | 67.4 | 76.3 | 63.0 |

### REFERENCES

- Xinzi Cao, Xiawu Zheng, Guanhong Wang, Weijiang Yu, Yunhang Shen, Ke Li, Yutong Lu, and Yonghong Tian. Solving the catastrophic forgetting problem in generalized category discovery. In *CVPR*, 2024.
- Aäron van den Oord, Yazhe Li, and Oriol Vinyals. Representation learning with contrastive predictive coding. *CoRR*, 2018.
- Hongjun Wang, Sagar Vaze, and Kai Han. Sptnet: An efficient alternative framework for generalized category discovery with spatial prompt tuning. In *ICLR*, 2024.
- Xin Wen, Bingchen Zhao, and Xiaojuan Qi. Parametric classification for generalized category discovery: A baseline study. In *ICCV*, 2023.
